# Supplementary material for: Understanding drivers and biases of simulated CO emissions by the INFERNO fire model over South America
Source: Copernicus journal article supplement (doi:10.5194/egusphere-2025-3579), 2025-08-19
Supplement: Supplementary file 1 [file egusphere-2025-3579-supplement.pdf]

## Supporting Information

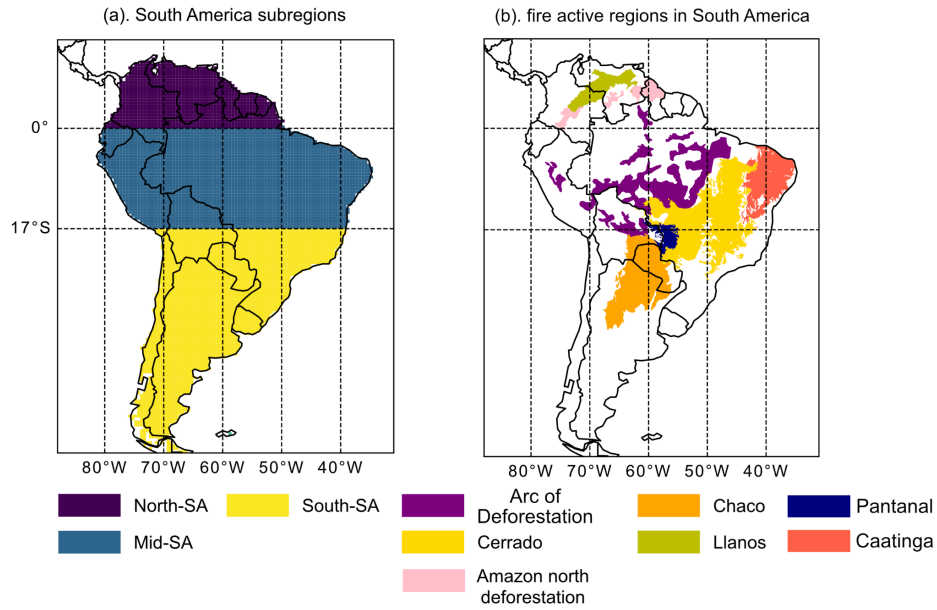

**Figure S1:** Studied (a) subregions and assessed (b) fire-prone regions in South America.

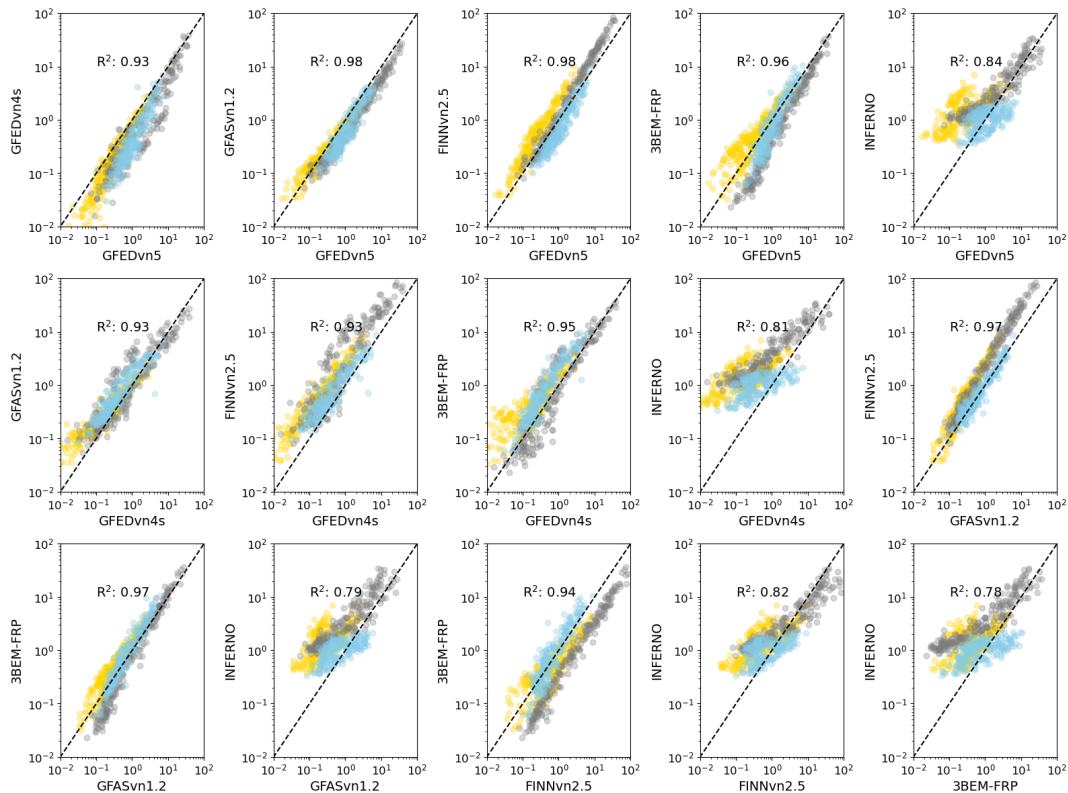

**Figure S2:** Spatial scatter plots of the comparison of total monthly subregional CO emissions [Tg month<sup>-1</sup>] between pairs of the inventories studied. The correlation squared ( $R^2$ ) between emissions is also shown. The yellow, grey and light blue scatter represent the emissions in North-SA, Mid-SA and South-SA, respectively. Notice that the y- and x-axes are on a logarithmic scale.

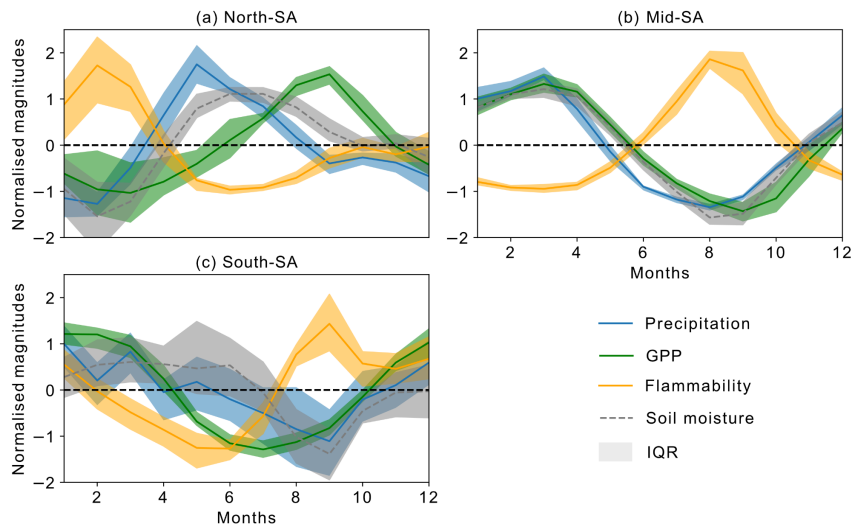

**Figure S3:** Normalised seasonal cycle of precipitation, gross primary productivity (GPP), flammability, and soil moisture in (a) North-SA, (b) Mid-SA and (c) South-SA. Every cycle has its interquartile range described by the shaded region.

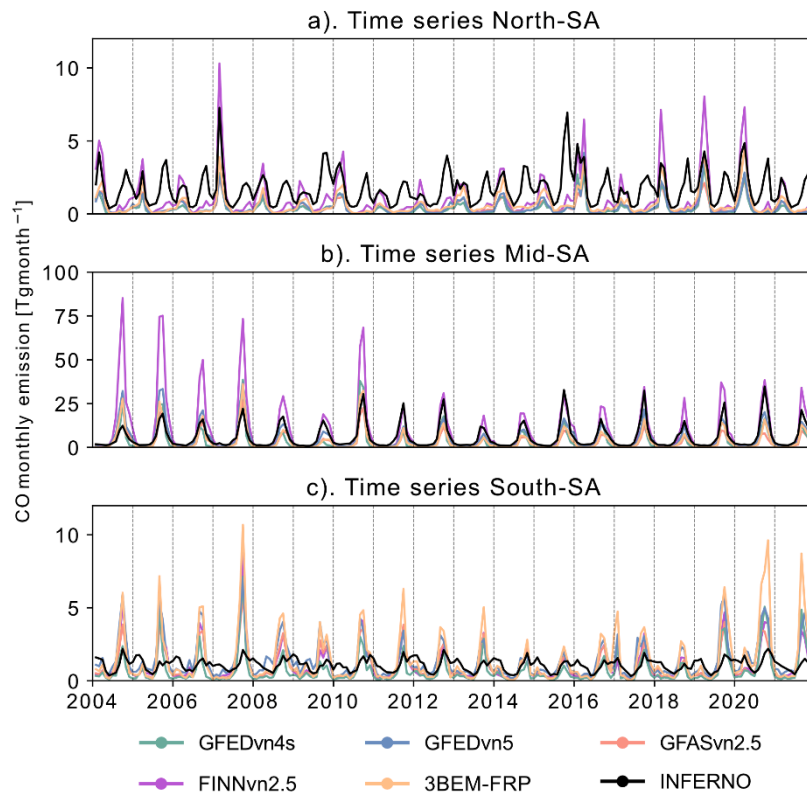

**Figure S4:** Estimated carbon monoxide (CO) emissions time series for (a) North-SA, (b) Mid-SA and (c) South-SA (SA = South America).

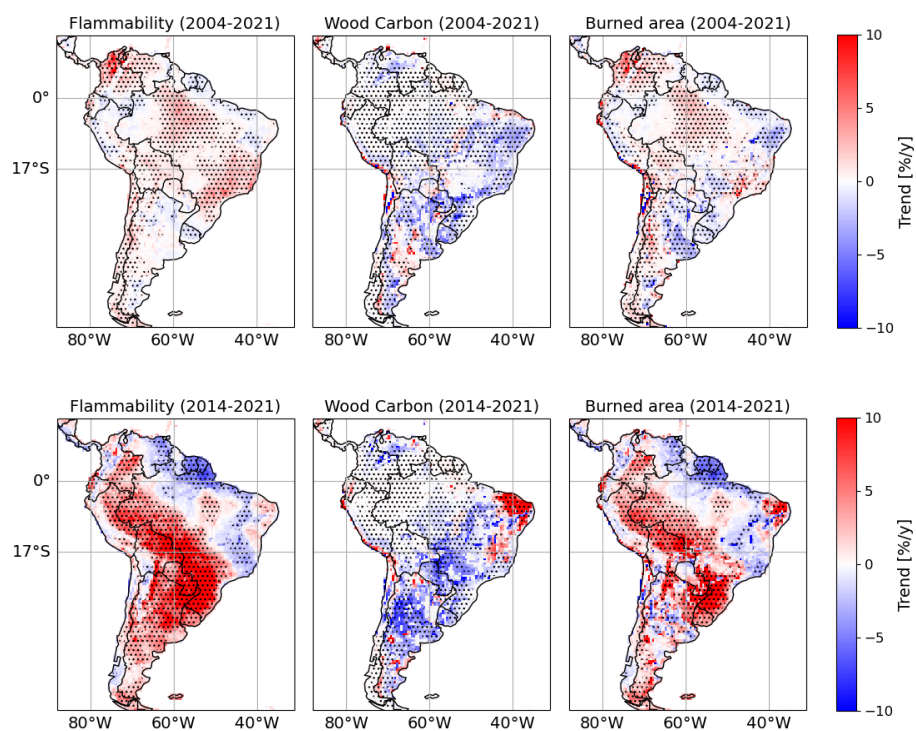

**Figure S5:** Long-term and short-term trends (%/year) of the JULES-INFERNO modelled flammability, wood carbon and burned area.

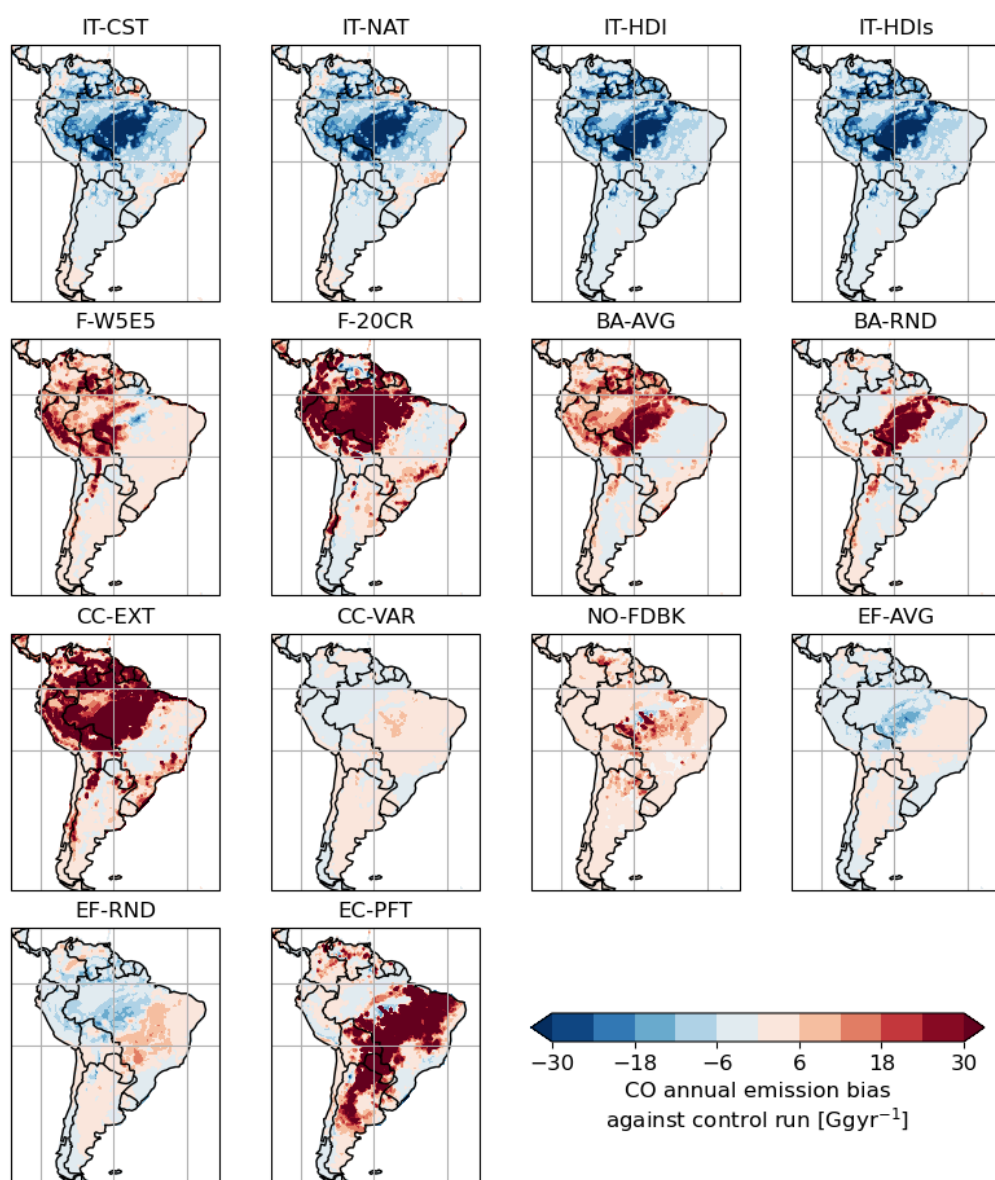

**Figure S6:** CO emission differences for INFERNO Experiment - Control. See Table 2 of the main manuscript for the description of the different INFERNO experiments.

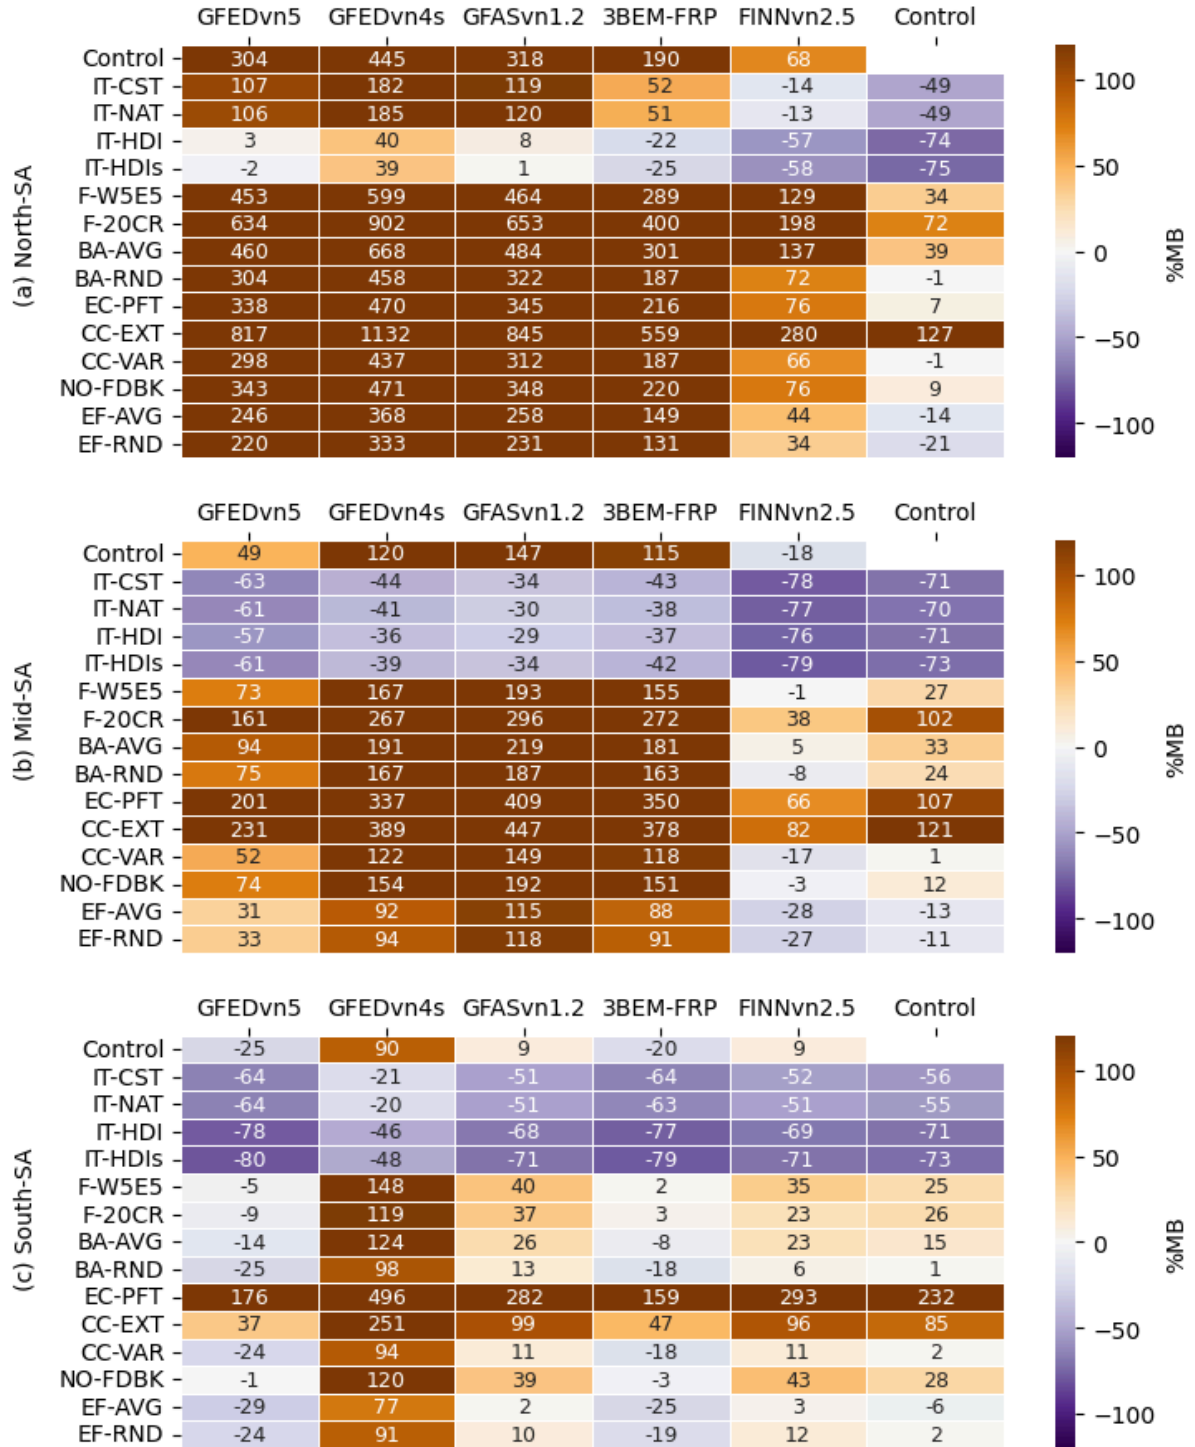

**Figure S7:** Spatiotemporal Average Percentage Bias (APB) of INFERNO simulations against the inventories.

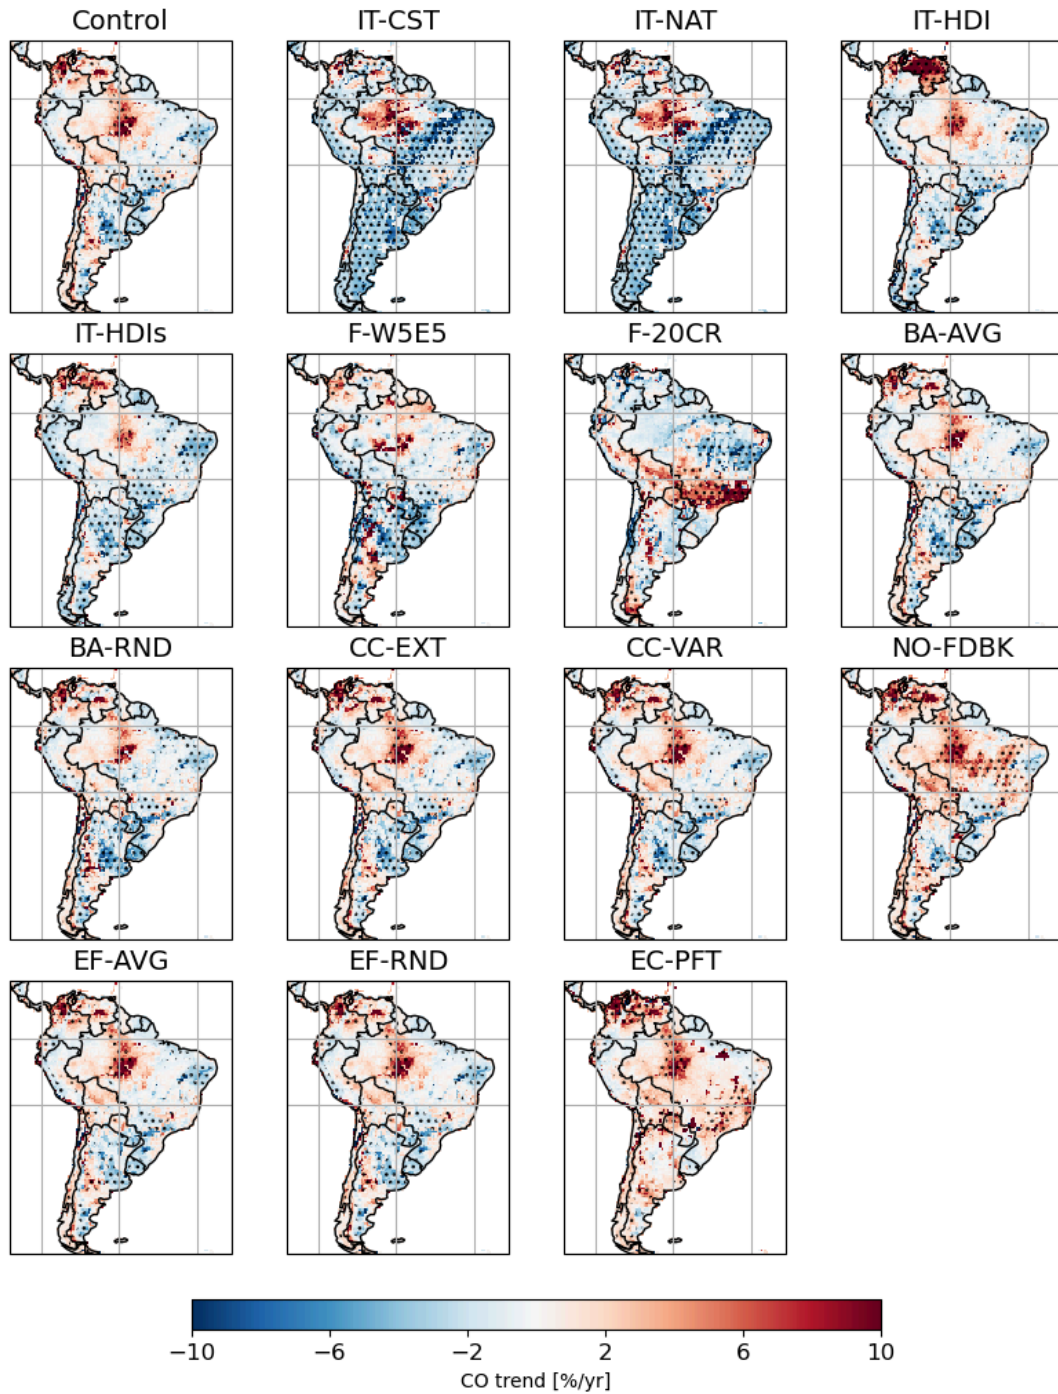

**Figure S8:** Long-term (2004-2021) CO emission tendencies for the different INFERNO simulations/experiments. See Table 2 of the main manuscript for the description of the different INFERNO experiments.

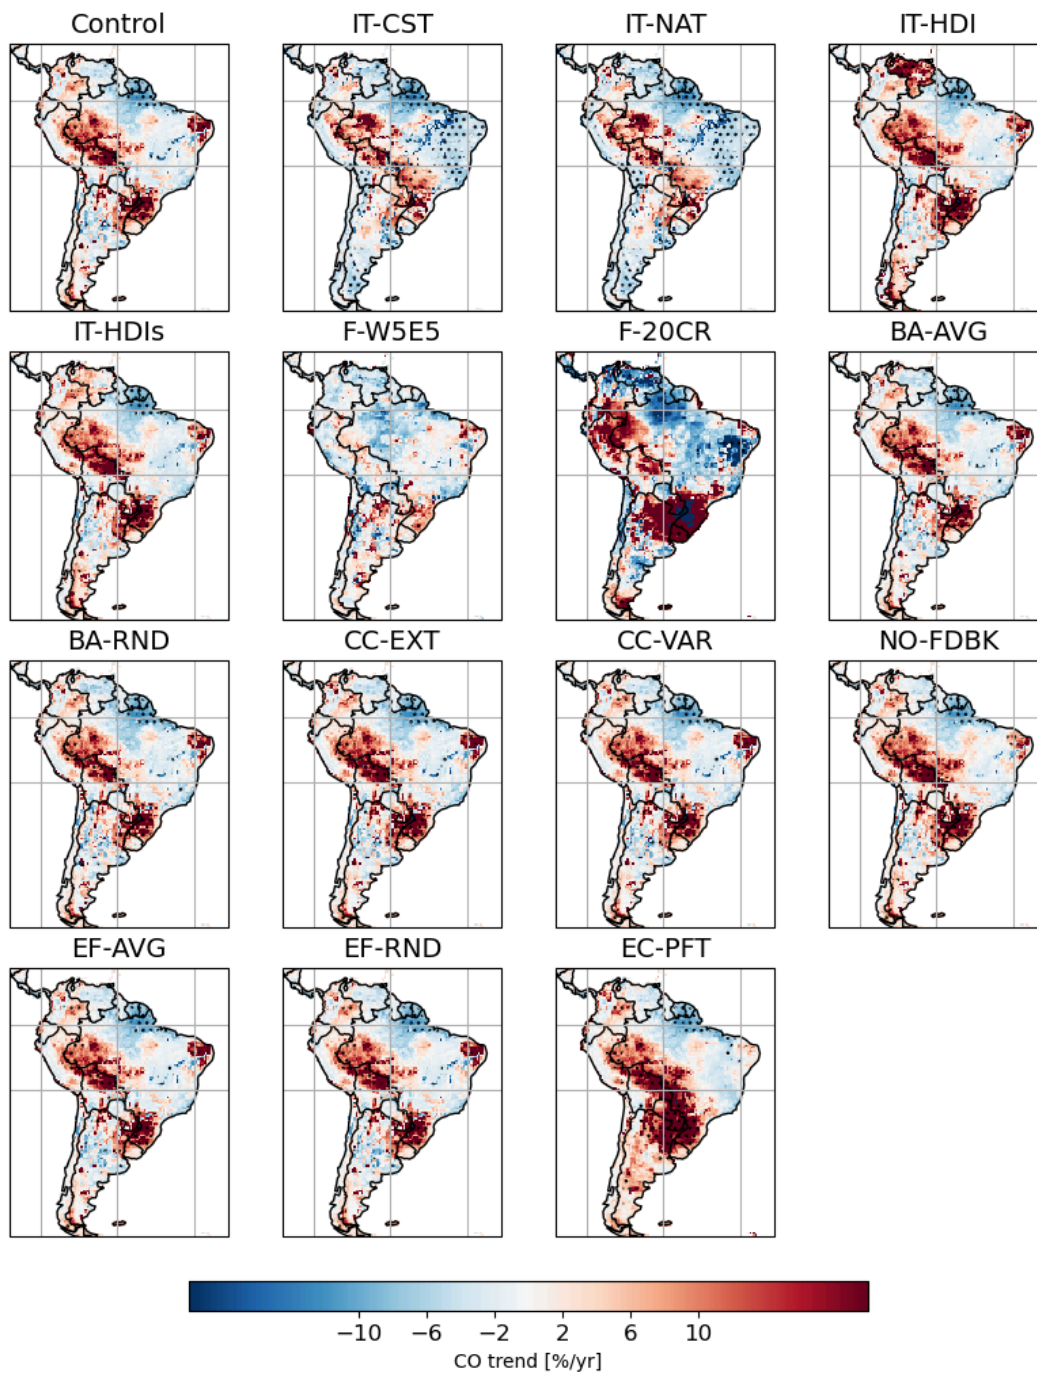

**Figure S9:** Short-term (2014-2021) CO emission tendencies for the different INFERNO simulations/experiments. See Table 2 of the main manuscript for the description of the different INFERNO experiments.

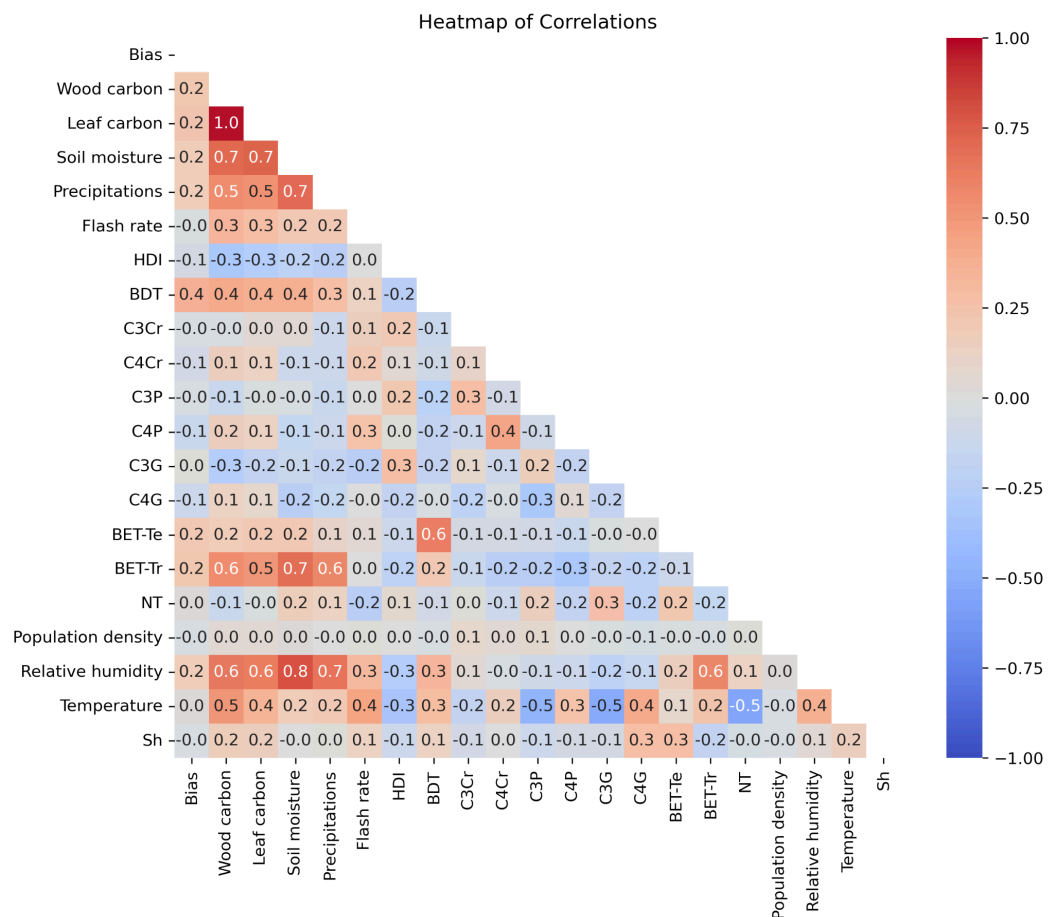

**Figure S10:** Pearson correlation between pairs of selected predictors. This step aims to prevent the model from potential multicollinearity.

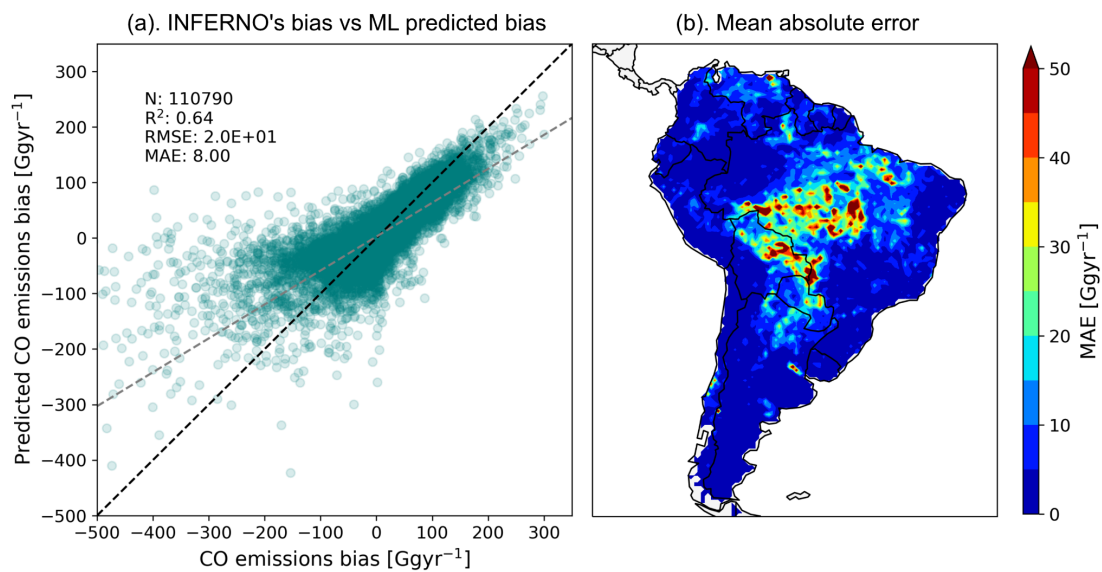

**Figure S11:** (a) Scatter plot of the comparison through South America of the actual INFERNO-inventory biases in CO emissions (Ggy<sup>-1</sup>) vs. the machine learning predicted INFERNO-inventory CO emission biases and (b) Mean absolute error (MAE) by pixel. N represents the sample size, R<sup>2</sup> is the correlation between the two variables, RMSE is the root mean square error.
